# Supplementary material for: Creating a Real-World Data, United States Healthcare Claims-Based Adaptation of Kurtzke Functional Systems Scores for Assessing Multiple Sclerosis Severity and Progression
Source: Springer Nature journal article supplement (doi:10.1007/s12325-021-01858-9), 2021-07-31
Supplement: MOESM1 [file 19408406]

## **Appendix 1**

### **Table 1 Supplementary: Conversion of Kurtzke Functional Systems Scores (KFSS) into ICD-9-CM**

*Note. Form below is publicly-available on the National Multiple Sclerosis Society website; retrieved from* [*http://www.nationalmssociety.org/NationalMSSociety/media/MSNationalFiles/Brochures/10-2-3-30-Functional_Systems_Kurtzke_Form.pdf*](http://www.nationalmssociety.org/NationalMSSociety/media/MSNationalFiles/Brochures/10-2-3-30-Functional_Systems_Kurtzke_Form.pdf)

| **SYSTEMS** | **ICD-9-CM** | **DESCRIPTION** |
| --- | --- | --- |
| ❏ **Pyramidal Functions (motor functions like walking)** | | |
| 0 - Normal |  |  |
| 1 - Abnormal signs without disability | 781.2 | ABNORMALITY OF GAIT |
| 2 - Minimal disability | 719.7 | DIFFICULTY IN WALKING |
| 3 - Mild to moderate paraparesis or hemiparesis (detectable weakness but most function sustained for short periods, fatigue a problem); severe monoparesis (almost no function) | 344.89 | OTHER SPECIFIED PARALYTIC SYNDROME |
| 344.9 | PARALYSIS UNSPECIFIED |
| 344.8 | OTHER SPECIFIED PARALYTIC SYNDROMES |
| V49.2 | MOTOR PROBLEMS WITH LIMBS |
| 4 - Marked paraparesis or hemiparesis (function is difficult), moderate quadriparesis (function is decreased but can be sustained for short periods); or monoplegia | 344.3 | MONOPLEGIA OF LOWER LIMB |
| 344.30 | MONOPLEGIA OF LOWER LIMB AFFECTING UNSPECIFIED SIDE |
| 344.31 | MONOPLEGIA OF LOWER LIMB AFFECTING DOMINANT SIDE |
| 344.32 | MONOPLEGIA OF LOWER LIMB AFFECTING NONDOMINANT SIDE |
| 344.4 | MONOPLEGIA OF UPPER LIMB |
| 344.40 | MONOPLEGIA OF UPPER LIMB AFFECTING UNSPECIFIED SIDE |
| 344.41 | MONOPLEGIA OF UPPER LIMB AFFECTING DOMINANT SIDE |
| 344.42 | MONOPLEGIA OF UPPER LIMB AFFECTING NONDOMINANT SIDE |
| 344.5 | UNSPECIFIED MONOPLEGIA |
| V57.1 | CARE INVOLVING OTHER PHYSICAL THERAPY |
| V57.81 | CARE INVOLVING ORTHOTIC TRAINING |
| 5 - Paraplegia, hemiplegia, or marked quadriparesis | 344.1 | PARAPLEGIA |
| 342.1 | SPASTIC HEMIPLEGIA |
| 342.10 | SPASTIC HEMIPLEGIA AND HEMIPARESIS AFFECTING UNSPECIFIED SIDE |
| 342.11 | SPASTIC HEMIPLEGIA AND HEMIPARESIS AFFECTING DOMINANT SIDE |
| 342.12 | SPASTIC HEMIPLEGIA AND HEMIPARESIS AFFECTING NONDOMINANT SIDE |
| 342.8 | OTHER SPECIFIED HEMIPLEGIA |
| 342.80 | OTHER SPECIFIED HEMIPLEGIA AND HEMIPARESIS AFFECTING UNSPECIFIED SIDE |
| 342.81 | OTHER SPECIFIED HEMIPLEGIA AND HEMIPARESIS AFFECTING DOMINANT SIDE |
| 342.82 | OTHER SPECIFIED HEMIPLEGIA AND HEMIPARESIS AFFECTING NONDOMINANT SIDE |
| 342.9 | HEMIPLEGIA UNSPECIFIED |
| 342.90 | UNSPECIFIED HEMIPLEGIA AND HEMIPARESIS AFFECTING UNSPECIFIED SIDE |
| 342.91 | UNSPECIFIED HEMIPLEGIA AND HEMIPARESIS AFFECTING DOMINANT SIDE |
| 342.92 | UNSPECIFIED HEMIPLEGIA AND HEMIPARESIS AFFECTING NONDOMINANT SIDE |
| V46.3 | WHEELCHAIR DEPENCENCE |
| 6 - Quadriplegia | 344.00 | QUADRIPLEGIA UNSPECIFIED |
| 344.09 | OTHER QUADRIPLEGIA |
| V49.84 | BED CONFINEMENT STATUS |
| 9 - (Unknown) |  |  |
| ❏ **Cerebellar Functions (coordination)** |  |  |
| 0 - Normal |  |  |
| 1 - Abnormal signs without disability | 781.92 | ABNORMAL POSTURE |
| 2 - Mild ataxia (tremor or clumsy movements easily seen, minor interference with function) | 333.1 | Essential and other specified forms of tremor |
| 3 - Moderate truncal or limb ataxia (tremor or clumsy movements interfere with function in all spheres) | 781.0 | ABNORMAL INVOLUNTARY MOVEMENTS |
| 4 - Severe ataxia in all limbs (most function is very difficult) | 334.3 | Other cerebellar ataxia |
| 334.4 | Cerebellar ataxia in diseases classified elsewhere |
| 5 - Unable to perform coordinated movements due to ataxia | 781.3 | Lack of coordination |
| 9 - (Unknown) |  |  |
| *❏ Record #1 in small box when weakness (grade 3 or worse on pyramidal) interferes with testing.* | | |
| ❏ **Brainstem Functions (speech and swallowing)** |  |  |
| 0 - Normal |  |  |
| 1 - Signs only | 379.52 | LATENT NYSTAGMUS |
| 2 - Moderate nystagmus or other mild disability | 379.50 | NYSTAGMUS UNSPECIFIED |
| 379.56 | OTHER FORMS OF NYSTAGMUS |
| 3 - Severe nystagmus, marked extraocular weakness, or moderate disability of other cranial nerves | 379.53 | VISUAL DEPRIVATION NYSTAGMUS |
| 379.54 | NYSTAGMUS ASSOCIATED WITH DISORDERS OF THE VESTIBULAR SYSTEM |
| 379.55 | DISSOCIATED NYSTAGMUS |
| 352 | DISORDERS OF OTHER CRANIAL NERVES |
| 352.0 | DISORDERS OF OLFACTORY (1ST) NERVE |
| 352.1 | GLOSSOPHARYNGEAL NEURALGIA |
| 352.2 | OTHER DISORDERS OF GLOSSOPHARYNGEAL (9TH) NERVE |
| 352.3 | DISORDERS OF PNEUMOGASTRIC (10TH) NERVE |
| 352.4 | DISORDERS OF ACCESSORY (11TH) NERVE |
| 352.5 | DISORDERS OF HYPOGLOSSAL (12TH) NERVE |
| 352.6 | MULTIPLE CRANIAL NERVE PALSIES |
| 352.9 | UNSPECIFIED DISORDER OF CRANIAL NERVES |
| 350 | TRIGEMINAL NERVE DISORDERS |
| 350.8 | OTHER SPECIFIED TRIGEMINAL NERVE DISORDERS |
| 350.9 | TRIGEMINAL NERVE DISORDER UNSPECIFIED |
| 351 | FACIAL NERVE DISORDERS |
| 351.0 | BELL'S PALSY |
| 351.8 | OTHER FACIAL NERVE DISORDERS |
| 351.9 | FACIAL NERVE DISORDER UNSPECIFIED |
| 378.5 | PARALYTIC STRABISMUS |
| 378.50 | PARALYTIC STRABISMUS UNSPECIFIED |
| 378.51 | THIRD OR OCULOMOTOR NERVE PALSY PARTIAL |
| 378.52 | THIRD OR OCULOMOTOR NERVE PALSY TOTAL |
| 378.53 | FOURTH OR TROCHLEAR NERVE PALSY |
| 378.54 | SIXTH OR ABDUCENS NERVE PALSY |
| 378.55 | EXTERNAL OPHTHALMOPLEGIA |
| 378.56 | TOTAL OPHTHALMOPLEGIA |
| V57.4 | CARE INVOLVING ORTHOPTIC TRAINING |
| 4 - Marked dysarthria or other marked disability | 784.5 | OTHER SPEECH DISTURBANCE |
| 784.51 | DYSARTHRIA |
| 784.52 | FLUENCY DISORDER IN CONDITIONS CLASSIFIED ELSEWHERE |
| 784.59 | OTHER SPEECH DISTURBANCE |
| 438.13 | DYSARTHRIA |
| 438.1 | SPEECH AND LANGUAGE DEFICITS |
| 438.10 | SPEECH AND LANGUAGE DEFICIT UNSPECIFIED |
| 438.12 | DYSPHASIA |
| 438.14 | FLUENCY DISORDER |
| 438.19 | OTHER SPEECH AND LANGUAGE DEFICITS |
| V57.3 | CARE INVOLVING SPEECH LANGUAGE THERAPY |
| 5 - Inability to swallow or speak | 438.82 | DYSPHAGIA CEREBROVASCULAR DISEASE |
| 787.2 | DYSPHAGIA |
| 787.20 | DYSPHAGIA UNSPECIFIED |
| 787.21 | DYSPHAGIA ORAL PHASE |
| 787.22 | DYSPHAGIA OROPHARYNGEAL PHASE |
| 787.23 | DYSPHAGIA PHARYNGEAL PHASE |
| 787.24 | DYSPHAGIA PHARYNGOESOPHAGEAL PHASE |
| 787.29 | OTHER DYSPHAGIA |
| V41.6 | PROBLEMS WITH SWALLOWING AND MASTICATION |
| 784.3 | APHASIA |
| 438.11 | APHASIA |
| 9 - (Unknown) |  |  |
| ❏ **Sensory Function (touch, vibration and pain)** |  |  |
| 0 - Normal |  |  |
| 1 - Vibration or figure-writing decrease only in one or two limbs | 336.3 | MYELOPATHY IN OTHER DISEASES CLASSIFIED ELSEWHERE |
| 2 - Mild decrease in touch or pain or position sense, and/or moderate decrease in vibration in one or two limbs; or vibratory (c/s figure writing) decrease alone in three or four limbs | 336.8 | OTHER MYELOPATHY |
| 3 - Moderate decrease in touch or pain or position sense, and/or essentially lost vibration in one or two limbs; or mild decrease in touch or pain and/or moderate decrease in all proprioceptive tests in three or four limbs | 438.6 | ALTERATIONS OF SENSATIONS |
| 4 - Marked decrease in touch or pain or loss of proprioception, alone or combined, in one or two limbs; or moderate decrease in touch or pain and/or severe proprioceptive decrease in more than two limbs | V49.3 | SENSORY PROBLEMS WITH LIMBS |
| 5 - Loss (essentially) of sensation in one or two limbs; or moderate decrease in touch or pain and/or loss of proprioception for most of the body below the head | 782.0 | DISTURBANCE OF SKIN SENSATION |
| 6 - Sensation essentially lost below the head | V48.5 | SENSORY PROBLEM WITH NECK AND TRUNK |
| 9 - (Unknown) |  |  |
| ❏ **Bowel and Bladder Function** (Rate on the basis of the worse function, either bowel or bladder) |  |  |
| 0 - Normal |  |  |
| 1 - Mild urinary hesitance, urgency, or retention | 788.69 | OTHER ABNORMALITY OF URINARY STREAM |
| 1 - Mild urinary hesitance, urgency, or retention | V47.4 | OTHER URINARY PROBLEMS |
| 2 - Moderate hesitance, urgency, retention of bowel or bladder, or rare urinary incontinence (intermittent self-catheterization, manual compression to evacuate bladder, or finger evacuation of stool) | 788.63 | URGENCY OF URINATION |
| 787.63 | FECAL URGENCY |
| 788.64 | URINARY HESITANCY |
| 787.61 | INCOMPLETE DEFECATION |
| 3 - Frequent urinary incontinence | 788.3 | Urinary incontinence |
| 788.31 | Urge incontinence |
| 788.33 | Mixed incontinence (male) (female) |
| 788.34 | Incontinence without sensory awareness |
| 788.38 | Overflow incontinence |
| 788.39 | Other urinary incontinence |
| 788.35 | POST-VOID DRIBBLING |
| 4 - In need of almost constant catheterization (and constant use of measures to evacuate stool) | V53.6 | FITTING AND ADJUSTMENT OF URINARY DEVICES |
| 5 - Loss of bladder function | 596.5 | Other functional disorders of bladder |
| 596.51 | Hypertonicity of bladder |
| 596.52 | Low bladder compliance |
| 596.53 | Paralysis of bladder |
| 596.54 | Neurogenic bladder not otherwise specified |
| 596.55 | Detrusor sphincter dyssynergia |
| 596.59 | Other functional disorder of bladder |
| 788.37 | CONTINUOUS LEAKAGE |
| 6 - Loss of bowel and bladder function | 787.60 | FULL INCONTINENCE OF FECES |
| V55.5 | ATTENTION TO CYSTOSTOMY |
| 9 - (Unknown) |  |  |
| ❏ **Visual Function** |  |  |
| 0 - Normal |  |  |
| 1 - Scotoma with visual acuity (corrected) better than 20/30 | 368.41 | SCOTOMA INVOLVING CENTRAL AREA |
| 368.42 | SCOTOMA OF BLIND SPOT AREA |
| 2 - Worse eye with scotoma with maximal visual acuity (corrected) of 20/30.20/59 | 368.43 | SECTOR OR ARCUATE VISUAL FIELD DEFECTS |
| 368.44 | OTHER LOCALIZED VISUAL FIELD DEFECT |
| 3 - Worse eye with large scotoma, or moderate decrease in fields, but with maximal visual acuity (corrected) of 20/60.20/99 | 369.3 | UNQUALIFIED VISUAL LOSS BOTH EYES |
| 369.8 | UNQUALIFIED VISUAL LOSS ONE EYE |
| 369.9 | UNSPECIFIED VISUAL LOSS |
| 4 - Worse eye with marked decrease of fields and maximal visual acuity (corrected) of 20/100.20/200; grade 3 plus maximal acuity of better eye of 20/60 or less | 369.25 | BETTER EYE: MODERATE VISION IMPAIRMENT; LESSER EYE: MODERATE VISION IMPAIRMENT |
| 5 - Worse eye with maximal visual acuity (corrected) less than 20/200; grade 4 plus maximal acuity of better eye of 20/60 or less | 369.7 | MODERATE OR SEVERE VISION IMPAIRMENT ONE EYE |
| 369.70 | LOW VISION ONE EYE NOT OTHERWISE SPECIFIED |
| 369.71 | ONE EYE: SEVERE VISION IMPAIRMENT; OTHER EYE: VISION NOT SPECIFIED |
| 369.72 | ONE EYE: SEVERE VISION IMPAIRMENT; OTHER EYE: NEAR-NORMAL VISION |
| 369.73 | ONE EYE: SEVERE VISION IMPAIRMENT; OTHER EYE: NORMAL VISION |
| 369.74 | ONE EYE: MODERATE VISION IMPAIRMENT; OTHER EYE: VISION NOT SPECIFIED |
| 369.75 | ONE EYE: MODERATE VISION IMPAIRMENT; OTHER EYE: NEAR-NORMAL VISION |
| 369.76 | ONE EYE: MODERATE VISION IMPAIRMENT; OTHER EYE: NORMAL VISION |
| 6 - Grade 5 plus maximal visual acuity of better eye of 20/60 or less | 369 | BLINDNESS AND LOW VISION |
| 369.0 | PROFOUND VISION IMPAIRMENT BOTH EYES |
| 369.00 | BLINDNESS OF BOTH EYES IMPAIRMENT LEVEL NOT FURTHER SPECIFIED |
| 369.01 | BETTER EYE: TOTAL VISION IMPAIRMENT; LESSER EYE: TOTAL VISION IMPAIRMENT |
| 369.02 | BETTER EYE: NEAR-TOTAL VISION IMPAIRMENT; LESSER EYE: NOT FURTHER SPECIFIED |
| 369.03 | BETTER EYE: NEAR-TOTAL VISION IMPAIRMENT; LESSER EYE: TOTAL VISION IMPAIRMENT |
| 369.04 | BETTER EYE: NEAR-TOTAL VISION IMPAIRMENT; LESSER EYE: NEAR-TOTAL VISION IMPAIRMENT |
| 369.05 | BETTER EYE: PROFOUND VISION IMPAIRMENT; LESSER EYE: NOT FURTHER SPECIFIED |
| 369.06 | BETTER EYE: PROFOUND VISION IMPAIRMENT; LESSER EYE: TOTAL VISION IMPAIRMENT |
| 369.07 | BETTER EYE: PROFOUND VISION IMPAIRMENT; LESSER EYE: NEAR-TOTAL VISION IMPAIRMENT |
| 369.08 | BETTER EYE: PROFOUND VISION IMPAIRMENT; LESSER EYE: PROFOUND VISION IMPAIRMENT |
| 369.1 | MODERATE OR SEVERE VISION IMPAIRMENT BETTER EYE; PROFOUND VISION IMPAIRMENT OF LESSER EYE |
| 369.10 | BLINDNESS ONE EYE; LOW VISION OTHER EYE |
| 369.11 | BETTER EYE: SEVERE VISION IMPAIRMENT; LESSER EYE: BLIND NOT FURTHER SPECIFIED |
| 369.12 | BETTER EYE: SEVERE VISION IMPAIRMENT; LESSER EYE: TOTAL VISION IMPAIRMENT |
| 369.13 | BETTER EYE: SEVERE VISION IMPAIRMENT; LESSER EYE: NEAR-TOTAL VISION IMPAIRMENT |
| 369.14 | BETTER EYE: SEVERE VISION IMPAIRMENT; LESSER EYE: PROFOUND VISION IMPAIRMENT |
| 369.15 | BETTER EYE: MODERATE VISION IMPAIRMENT; LESSER EYE: BLIND NOT FURTHER SPECIFIED |
| 369.16 | BETTER EYE: MODERATE VISION IMPAIRMENT; LESSER EYE: TOTAL VISION IMPAIRMENT |
| 369.17 | BETTER EYE: MODERATE VISION IMPAIRMENT; LESSER EYE: NEAR-TOTAL VISION IMPAIRMENT |
| 369.18 | BETTER EYE: MODERATE VISION IMPAIRMENT; LESSER EYE: PROFOUND VISION IMPAIRMENT |
| 369.2 | MODERATE OR SEVERE VISION IMPAIRMENT BOTH EYES |
| 369.20 | LOW VISION BOTH EYES NOT OTHERWISE SPECIFIED |
| 369.21 | BETTER EYE: SEVERE VISION IMPAIRMENT; LESSER EYE; IMPAIRMENT NOT FURTHER SPECIFIED |
| 369.22 | BETTER EYE: SEVERE VISION IMPAIRMENT; LESSER EYE: SEVERE VISION IMPAIRMENT |
| 369.23 | BETTER EYE: MODERATE VISION IMPAIRMENT; LESSER EYE: IMPAIRMENT NOT FURTHER SPECIFIED |
| 369.24 | BETTER EYE: MODERATE VISION IMPAIRMENT; LESSER EYE: SEVERE VISION IMPAIRMENT |
| 369.4 | LEGAL BLINDNESS AS DEFINED IN U.S.A. |
| 369.6 | PROFOUND VISION IMPAIRMENT ONE EYE |
| 369.60 | BLINDNESS ONE EYE NOT OTHERWISE SPECIFIED |
| 369.61 | ONE EYE: TOTAL VISION IMPAIRMENT; OTHER EYE: NOT SPECIFIED |
| 369.62 | ONE EYE: TOTAL VISION IMPAIRMENT; OTHER EYE: NEAR-NORMAL VISION |
| 369.63 | ONE EYE: TOTAL VISION IMPAIRMENT; OTHER EYE: NORMAL VISION |
| 369.64 | ONE EYE: NEAR-TOTAL VISION IMPAIRMENT; OTHER EYE: VISION NOT SPECIFIED |
| 369.65 | ONE EYE: NEAR-TOTAL VISION IMPAIRMENT; OTHER EYE: NEAR-NORMAL VISION |
| 369.66 | ONE EYE: NEAR-TOTAL VISION IMPAIRMENT; OTHER EYE: NORMAL VISION |
| 369.67 | ONE EYE: PROFOUND VISION IMPAIRMENT; OTHER EYE: VISION NOT SPECIFIED |
| 369.68 | ONE EYE: PROFOUND VISION IMPAIRMENT; OTHER EYE: NEAR-NORMAL VISION |
| 369.69 | ONE EYE: PROFOUND VISION IMPAIRMENT; OTHER EYE: NORMAL VISION |
| 9 - (Unknown) |  |  |
| *❏ Record #1 in small box for presence of temporal pallor* | | |
| ❏ **Cerebral (or Mental) Functions** |  |  |
| 0 - Normal |  |  |
| 1 - Mood alteration only (does not affect EDSS score) | 293.83 | MOOD DISORDER WITH HALLUCINATIONS IN CONDITIONS CLASSIFIED ELSEWHERE |
| 2 - Mild decrease in mentation | 293.89 | OTHER SPECIFIED TRANSIENT MENTAL DISORDERS DUE TO CONDITIONS CLASSIFIED ELSEWHERE |
| 293.9 | UNSPECIFIED TRANSIENT MENTAL DISORDERS DUE TO CONDITIONS CLASSIFIED ELSEWHERE |
| 331.83 | MILD COGNITIVE IMPAIRMENT SO STATED |
| 438.0 | COGNITIVE DEFICITS |
| 799.5 | SIGNS AND SYMPTOMS INVOLVING COGNITION |
| 799.51 | ATTENTION OR CONCENTRATION DEFICIT |
| 799.52 | COGNITIVE COMMUNICATION DEFICIT |
| 799.53 | VISUOSPATIAL DEFICIT |
| 799.54 | PSYCHOMOTOR DEFICIT |
| 799.55 | FRONTAL LOBE AND EXECUTIVE FUNCTION DEFICIT |
| 799.59 | OTHER SIGNS AND SYMPTOMS INVOLVING COGNITION |
| 3 - Moderate decrease in mentation | V57.2 | CARE INVOLVING OCCUPATIONAL THERAPY AND VOCATIONAL REHABILITATION |
| V57.21 | CARE INVOLVING OCCUPATIONAL THERAPY |
| V57.22 | CARE INVOLVING VOCATIONAL THERAPY |
| 294.0 | AMNESTIC DISORDER IN CONDITIONS CLASSIFIED ELSEWHERE |
| 4 - Marked decrease in mentation (chronic brain syndrome moderate) | 294.8 | OTHER PERSISTENT MENTAL DISORDERS DUE TO CONDITIONS CLASSIFIED ELSEWHERE |
| 294.9 | UNSPECIFIED PERSISTENT MENTAL DISORDERS DUE TO CONDITIONS CLASSIFIED ELSEWHERE |
| 310.89 | OTHER SPECIFIED NONPSYCHOTIC MENTAL DISORDER |
| 310.9 | UNSPECIFIED NONPSYCHOTIC MENTAL DISORDER FOLLOWING ORGANIC BRAIN DAMAGE |
| 331.7 | CEREBRAL DEGENERATION IN DISEASES CLASSIFIED ELSEWHERE |
| 331.8 | OTHER CEREBRAL DEGENERATION |
| 331.89 | OTHER CEREBRAL DEGENERATION |
| 331.9 | CEREBRAL DEGENERATION UNSPECIFIED |
| 5 - Dementia or chronic brain syndrome severe or incompetent | 294.1 | DEMENTIA IN CONDITIONS CLASSIFIED ELSEWHERE |
| 294.10 | DEMENTIA IN CONDITIONS CLASSIFIED ELSEWHERE WITHOUT BEHAVIORAL DISTURBANCE |
| 294.11 | DEMENTIA IN CONDITIONS CLASSIFIED ELSEWHERE WITH BEHAVIORAL DISTURBANCE |
| 294.2 | DEMENTIA UNSPECIFIED |
| 294.20 | DEMENTIA UNSPECIFIED WITHOUT BEHAVIORAL DISTURBANCE |
| 294.21 | DEMENTIA UNSPECIFIED WITH BEHAVIORAL DISTURBANCE |
| 331.0 | ALZHEIMER'S DISEASE |
| 331.1 | FRONTOTEMPORAL DEMENTIA |
| 331.19 | OTHER FRONTOTEMPORAL DEMENTIA |
| 9 - (Unknown) |  |  |

EDSS, Expanded Disability Status Scale; ICD-9-CM, International Classification of Diseases, 9th revision, Clinical Modification; KFSS, Kurtzke Functional Systems Scores

## **Appendix 2**

### **Table 2 Supplementary. Distribution by First and Second EDSS Score Groups during the EDSS Assessment Period among 608 Progressive MS**

| **First EDSS Score Group** | **Second EDSS Score Group, n (row %)** | | | | | | | | | |
| --- | --- | --- | --- | --- | --- | --- | --- | --- | --- | --- |
| **1 - <2** | **2 - <3** | **3 - <4** | **4 - <5** | **5 - <6** | **6 - <7** | **7 - <8** | **8 - <9** | **9+** | **Total** |
| **0 - < 1** | 28 (5.3) | 25 (4.7) | 47 (8.9) | 103 (19.4) | 247 (46.6) | 28 (5.3) | 52 (9.8) | 0 | 0 | 530 (100) |
| **1 - < 2** | 0 | 0 | 1 (12.5) | 3 (37.4) | 4 (50.0) | 0 | 0 | 0 | 0 | 8 (100) |
| **2 - < 3** | 0 | 0 | 1 (16.7) | 1 (16.7) | 2 (33.3) | 1 (16.7) | 1 (16.7) | 0 | 0 | 6 (100) |
| **3 - < 4** | 0 | 0 | 0 | 4 (36.4) | 6 (54.5) | 0 | 1 (9.1) | 0 | 0 | 11 (100) |
| **4 - < 5** | 0 | 0 | 0 | 0 | 16 (64.0) | 1 (4.0) | 8 (32.0) | 0 | 0 | 25 (100) |
| **5 - < 6** | 0 | 0 | 0 | 0 | 0 | 13 (50) | 12 (46.2) | 1 (3.8) | 0 | 26 (100) |
| **6 - < 7** | 0 | 0 | 0 | 0 | 0 | 0 | 2 (100) | 0 | 0 | 2 (100) |
| **7 - < 8** | 0 | 0 | 0 | 0 | 0 | 0 | 0 | 0 | 0 | 0 |
| **8+** | 0 | 0 | 0 | 0 | 0 | 0 | 0 | 0 | 0 | 0 |
| **Total** | 28 (4.6) | 25 (4.1) | 49 (8.1) | 111 (18.3) | 275 (45.2) | 43 (7.1) | 76 (12.5) | 1 (0.2) | 0 (0) | 608 (100) |

EDSS, Expanded Disability Status Scale; MS, multiple sclerosis
